# Supplementary material for: Purification of Boron Nitride Nanotubes Enhances Biological Application Properties
Source: MDPI journal article supplement (doi:10.3390/ijms21041529), 2020-02-24
Supplement: s1 [file s1]

## Purification Processes

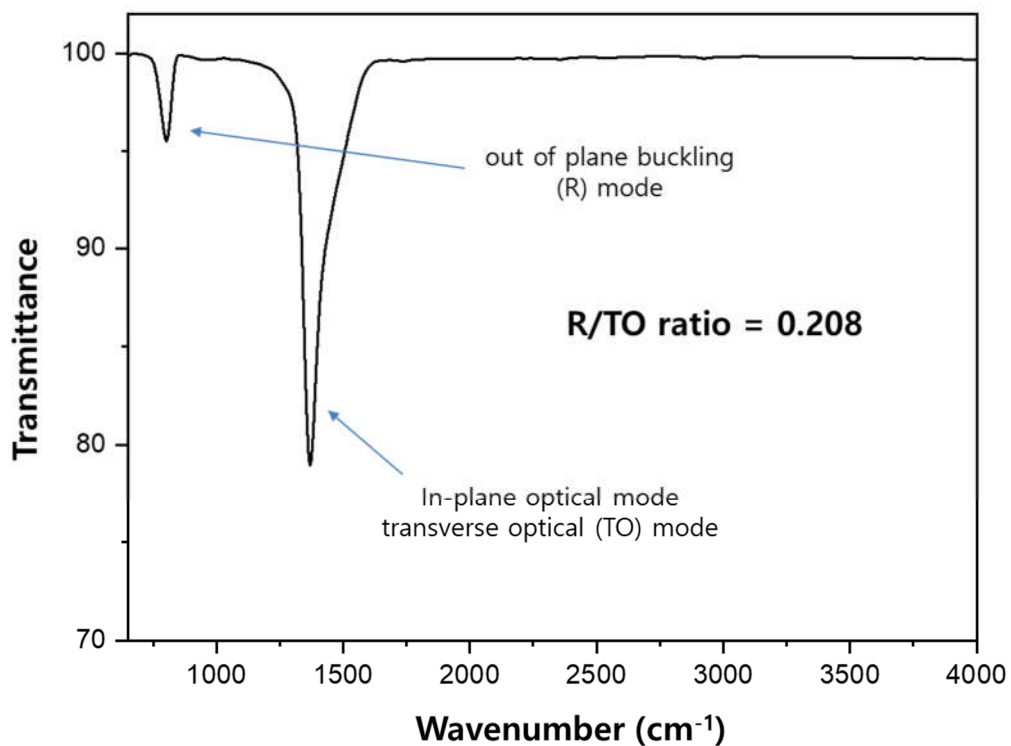

**Figure S1.** IR spectrum of purified BNNT. The R/TO ratio of 0.208 is corresponding to 22% h-BN content and 78% BNNT based on IR analysis reported in *Nanoscale Advanced*, 2019, 1, 1693-2701.

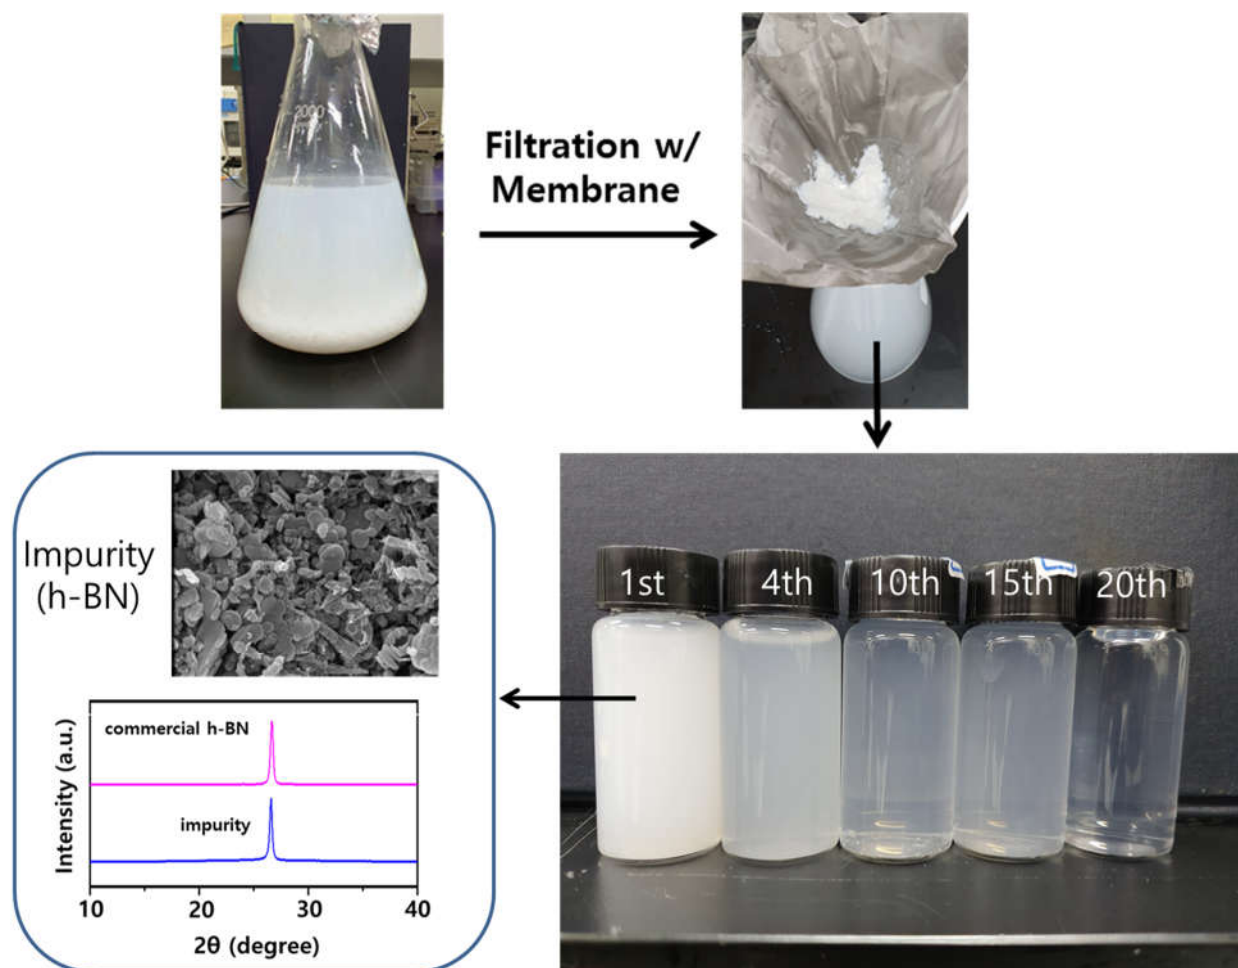

**Figure S2.** The filtered solution during repeating the filtration process using porous membrane.
